1                    Production and use of triploid zebrafish for surrogate reproduction

2

3 Roman Franěk\*, Tomáš Tichopád, Michaela Fučíková, Christoph Steinbach, Martin Pšenička

4 RF [franek@frov.jcu.cz](mailto:franek@frov.jcu.cz), TT [tichopad@frov.jcu.cz](mailto:tichopad@frov.jcu.cz), CS [steinbach@frov.jcu.cz](mailto:steinbach@frov.jcu.cz), MP  
5 [psenicka@frov.jcu.cz](mailto:psenicka@frov.jcu.cz)

6 University of South Bohemia in České Budějovice, Faculty of Fisheries and Protection of Waters,  
7 South Bohemian Research Center of Aquaculture and Biodiversity of Hydrocenoses, Zátiší 728/II,  
8 389 25 Vodňany, Czech Republic;

9

10 \*Corresponding author: Roman Franěk, Zátiší 728/II, 389 25 Vodňany, Czech Republic  
11 [franek@frov.jcu.cz](mailto:franek@frov.jcu.cz)

12 Abstract:

13 We report for first time comparison of two approaches for zebrafish triploid production using cold  
14 shock and heat shock treatment. Subsequently, produced triploid zebrafish were used as a recipients  
15 for intraperitoneal transplantation of ovarian and testicular cells originating from vas:EGFP strain in  
16 order to verify their suitability for surrogate reproduction. Heat shock treatment was far more  
17 effective evaluated as success rate of triploid production and viability in comparison to cold shock.  
18 Triploids were produced with up to 100% efficiency in particular females. As expected, all triploids  
19 were males. Subsequently, germ cells transplantation revealed that triploids are suitable surrogate  
20 hosts. Production of donor-derived sperm was achieved in 23% and 16% of triploids transplanted  
21 by testicular and ovarian cells, respectively. Success of the transplantation was confirmed by  
22 positive GFP signal detected in gonads of dissected fish and stripped sperm. Germline transmission  
23 was confirmed by fertilization tests followed by PCR analysis of embryos. Reproductive success of  
24 germline chimera triploids evaluated as fertilization rate and progeny development was comparable  
25 to control groups.

26 Keywords: zebrafish, chromosome manipulation, triploid, germ cell transplantation, surrogate  
27 reproduction

28 Declarations of interest: none

## 29 **1 Introduction:**

30 Surrogate reproduction in fish via intraperitoneal germ cell transplantation is a promising  
31 technology for aquaculture as well preservation of endangered species when recipient species with  
32 more favorable characteristics can be used [1]. So far germ cell technologies are being applied in  
33 wide range of fish species such as, salmonids [2,3], cyprinids [4,5], Nile tilapia [6–8], medaka [9],  
34 sturgeons [10–12] or several marine fish species [13,14]. One from the main prerequisites for  
35 successful surrogate propagation is the host's sterility ensuring no contamination of donor-derived  
36 gametes during reproduction [2] and very likely lower competition for space in gonads between  
37 endogenous germ cells and introduced exogenous germ cells resulting in higher production of  
38 donor-derived gametes.

39 Importance of zebrafish for surrogate reproduction is in its biological and reproductive  
40 characteristics as fast maturation or availability of transgenic lines could enable to study unknown  
41 factors affecting the success of germ cell transplantation. Moreover, zebrafish can serve as a  
42 valuable model for sterility research since several distinct methods are available for sterility  
43 induction nowadays Early ablation of primordial germ cells (PGCs) can be achieved using gene  
44 knock out approaches such as Zinc Finger Nucleases against *dead end (dnd)* gene [15], or gene  
45 knock down with *dnd* antisense morpholino oligonucleotide [16,17]. Both methods require  
46 microinjection into embryos, thus an alternative approach using immersion in vivo morpholino  
47 against *dnd* can be more convenient in case of large scale application (Wong and Zohar, 2015).  
48 Sterility was achieved via PGCs depletion in transgenic fish with artificially induced nitroreductase  
49 expression in PGCs exclusively using immersion into metronidazole enzyme which was converted  
50 into toxic metabolites and only PGCs targeted toxicity was achieved [19]. Similarly, PGCs  
51 migration was disrupted in transgenic fish which had SDF1 expression controlled by a heat shock  
52 protein. Regular event of PGCs migration is beside other mechanism guided by SDF1 gradient  
53 towards the genital ridge, however, heat treatment caused throughout expression of SDF1 resulting  
54 in migration failure and production of sterile fish [20]. A cytostatic drug such as busulfan was used  
55 successfully in combination with thermal treatment, however, this method was developed only for  
56 adult fishes, because intraperitoneal administration is necessary [21]. All abovementioned methods  
57 for sterility achievement can be regarded as relatively demanding from point of time, knowledge  
58 and equipment. Thus a simple method for sterile fish generation such as production of infertile  
59 Danio hybrids by crossing zebrafish and pearl danio is convenient from point of time and possibility  
60 to produce host by simple fertilization without additional treatment [22]. Similarly, triploid fish  
61 can be produced as hosts in surrogate reproduction technology [2,9,14]. Moreover, triploids or

62 sterile hybrids can still be more favorable way for surrogate host production in fish species without  
63 mapped genomes or at least genes of interest not enabling use of targeted transgenic or gene  
64 silencing approaches [23], or when large scale production of sterile recipients is needed or  
65 microinjection delivery of compounds inducing sterility into the eggs is difficult due to sturdy  
66 chorion as it is known for marine fish species [24,25].

67 Three sets of chromosomes in artificially induced triploids cannot proceed through meiosis and  
68 gamete maturation regularly, resulting in gametogenesis arrest or aneuploid gametes production  
69 further incompatible with the proper embryonic development [26]. Triploids can be induced by  
70 pressure or temperature treatment or electric shock resulting in inhibition of second polar body  
71 extrusion. However, all abovementioned physical treatments, require equipment such as pressure  
72 chamber and thermostat respectively [27–32]. Therefore, an alternative technique using cold shock  
73 could be convenient from point of the material equipment, might has less deleterious effect on the  
74 survival but with the same efficiency of triploid induction rate as the heat shock treatment.

75 Method for triploid zebrafish production using heat shock treatment was published already [33].  
76 However, we did not succeed satisfactorily using the abovementioned heat shock protocol in our  
77 laboratory. Therefore we revised the procedure for heat shock treatment and compared it with cold  
78 shock to identify an optimal condition for triploid zebrafish production with respect to achieve the  
79 highest survival and produce triploid fish. Suitability of triploid fish as surrogate recipients was  
80 tested by intraperitoneal transplantation by testicular and ovarian cells from vas:EGFP strain and  
81 subsequent production of donor-derived gametes with fertility tests confirmed by fluorescent  
82 microscopy and DNA analysis.

83

## 84 **2 Material and methods**

85 The study was conducted at the Faculty of Fisheries and Protection of Waters (FFPW), University  
86 of South Bohemia in České Budějovice, Vodňany, Czech Republic. The facility has the competence  
87 to perform experiments on animals (Act no. 246/1992 Coll., ref. number 16OZ19179/2016-17214).  
88 The methodological protocol of the current study was approved by the expert committee of the  
89 Institutional Animal Care and Use Committee of the FFPW according to the law on the protection  
90 of animals against cruelty (reference number: MSMT-6406/119/2). The study did not involve  
91 endangered or protected species. Martin Pšenička owns the certificate (CZ 00673) giving capacity  
92 to conduct and manage experiments involving animals according to section 15d paragraph 3 of Act  
93 no. 246/1992 Coll.

94

### 95 **2.1 Fish and gamete collection**

96 Mature zebrafish spawners from AB line were purchased from European Zebrafish Resource Center  
97 (Germany), vas:EGFP line was purchased from University of Liège, Belgium, were maintained in a  
98 zebrafish housing system (ZebTEC Active Blue) at 28 °C, 14L:10D photoperiod, feeding two times  
99 with Tetramin flakes and once with *Artemia* nauplii. Fish were set into the spawning chambers  
100 afternoon before the spawning (one male and one female) and separated with a barrier. On the light  
101 onset of the next day, the barrier was removed and fish were observed for oviposition. Selected fish  
102 were immediately transferred into the laboratory. Gametes for *in vitro* fertilization were obtained  
103 after anesthesia in 0.05% tricaine solution (Ethyl 3-aminobenzoate methanesulfonate). Sperm from  
104 at least 5 males was pooled together in 50 µl of Kurokura 180 solution [34], eggs were collected  
105 from each female separately and fertilized promptly. Fertilized eggs were divided into control and  
106 treated groups and were cultured at 28.5 °C constantly.

107

### 108 **2.2 Triploid induction and rearing**

109 Cold shock (CS) treatment for the given time was conducted with fertilized eggs in a plastic strainer  
110 placed in a Styrofoam box with 2 L of ice chilled water. Heat shock (HS) treatment was conducted  
111 in a plastic strainer placed in a 5L recirculated water bath with thermostat under varying conditions.  
112 Parameters used in all CS and HS trials are summarized in Table 1.

113 The remainder of the intact fertilized eggs from each female was kept as a non-treated control.  
114 Females (n = 7) producing eggs with fertilization rate in control below 65% were regarded as  
115 having bad quality and were excluded from results and replaced by new females. Swim-up larvae  
116 were fed by paramecium for one week, later on with *Artemia* nauplii *ad libitum* and held until the

l17 first month in an incubator in plastic boxes. Fish were then transferred into a zebrafish housing  
l18 system and were kept until reaching maturity. Five females with separately fertilized eggs were  
l19 used as replicates. Eggs from each female were divided into approximately same portions into 3(4)  
l20 groups according to tested variables in performed treatment and one untreated control constantly  
l21 held at 28.5 °C. Survival was recorder as a percentage of living embryos from number of fertilized  
l22 eggs

| Treatment          | Temperature     | Duration time  | Initiation time |
|--------------------|-----------------|----------------|-----------------|
| Cold shock         |                 |                |                 |
| CS temperature     | 3, 6, 9 °C      | 5 min          | 1 mpf           |
| CS duration        | 6 °C            | 5, 10, 15 min  | 1 mpf           |
| CS initiation time | 6 °C            | 5 min          | 0.5, 1 mpf      |
| Heat shock         |                 |                |                 |
| HS temperature     | 41, 41.4, 42 °C | 2 min          | 2 mpf           |
| HS duration        | 41.4 °C         | 1, 2, 3, 4 min | 2 mpf           |
| HS initiation      | 41.4 °C         | 2 min          | 1, 2 mpf        |

l23 **Table 1** Variables tested during optimization of triploid zebrafish production.

l24 mpf – minute post fertilization

l25

### l26 **2.3 Flow cytometry**

l27 Only larvae after swim-up stage were used for triploidy confirmation in trials in order to obtain  
l28 results representing only viable triploids. Whole larvae (euthanized by tricaine overdosing) or later  
l29 on fin clips were processed using a kit for nuclei staining CyStain UV Precise T (Sysmex Partec  
l30 GmbH, Germany) according to the manufacturer's protocol. The relative DNA content was  
l31 determined using a CyFlow Ploidy Analyzer (Sysmex Partec GmbH, Germany) against samples  
l32 from diploid control groups. Ten larvae were analyzed from each female in each treatment and  
l33 group.

l34

### l35 **2.4 Transplantation**

l36 Male and female germ cell donors from vas:EGFP line were euthanized by tricaine overdosing,  
l37 decapitated, the body was washed with 70% ethanol. Testis from two donors were excised  
l38 aseptically. Each testis was cut into 4-6 fragments and washed several times in phosphate buffered  
l39 saline (PBS) in order to remove leaking sperm. Medium for testicular tissue digestion contained  
l40 0.1% trypsin, 0.05% DNase dissolved in PBS. Fragments were collected by a pipette and  
l41 transferred into 2 mL tube with 1 mL of digestion medium and were further minced with scissors  
l42 and placed on a laboratory shaker for 50 min. Digestion was terminated by addition of 1 mL L-15

l43 and 10% FBS (v:v). The suspension was filtrated through a 30 µm nylon filter (CellTrics® Sysmex,  
l44 Germany) and centrifuged at 0.3 g for 10 min. The supernatant was removed and the pellet was  
l45 resuspended in 40 µl L-15 with 10% FBS. Female germ cells were collected from juvenile donors  
l46 (2 months, n = 5 per one transplantation trial) and digested as described for testicular cells. After  
l47 centrifugation, ovarian cells suspension was washed and filtrated two times to remove excess of  
l48 debris.

l49 Triploid recipients produced by optimized HS procedure were anaesthetized at 7 dpt in 0.05%  
l50 tricaine and placed on petri dish coated with 1% agar. Testicular and ovarian cell suspension was  
l51 loaded into the glass capillary attached to MN-153 micromanipulator (Narishige) and FemtoJet® 4x  
l52 injector (Eppendorf). Triploid recipients were injected by approximately 3000-5000 of testicular  
l53 cells (TC group) or 500 ovarian cells (OC group) per individual. Each transplantation trial for TC  
l54 and OC groups consisted of 30 transplanted fish when triploid recipients were originating from  
l55 same batch in both groups. The remainder of non-injected triploids and non HS treated diploids was  
l56 kept as a control and no operation was conducted on them. Transplanted fish were left to recover in  
l57 dechlorinated tap water. Survival and colonization rate of transplanted cells was monitored until  
l58 adulthood. Fish were observed and photographed under a fluorescent stereomicroscope (Leica  
l59 M205 FA) with fluorescent filters DAPI/FITC/TRITC (order no 10450614) or GFP (order no  
l60 10450469) equipped with camera (Leica DMC 6200).

l61

## l62 **2.5 Production of donor-derived gametes**

l63 All adult surviving fish were screened for positive GFP signal in their testis. GFP positive germline  
l64 chimeras were set into spawning chamber afternoon (two or three males and separated one female).  
l65 Males were following morning anaesthetized and sperm was collected and observed under an  
l66 inverted fluorescent microscope to detect positive GFP signal in sperm. All fish producing GFP  
l67 positive sperm from each transplantation trial were pooled together into one TC and one OC group  
l68 and left to recover for 4 weeks.

l69 Randomly selected fish from pooled TC and OC group (10 fish per group) were propagated by  
l70 semi-natural mating and *in vitro* fertilization. Semi-natural mating was conducted in spawning  
l71 chambers when one germline chimera triploid male and two AB females in reproductive condition  
l72 were set together in the afternoon and separated with a barrier. Next day at the onset of light, a  
l73 barrier was removed and fish were allowed to spawn for three hours. Spawned eggs were collected  
l74 and the survival rate was monitored. Swim up larvae from each group were pooled and 10  
l75 individuals were selected randomly and used for PCR analysis to verify the efficiency of germline

176 transmission. Used germline chimeras in semi-natural mating were separated and were not used for  
177 following *in vitro* fertilization. Procedure for *in vitro* fertilization was the same as described for AB  
178 line (2.1). Sperm collected from each chimeric male was stored separately in immobilizing solution.  
179 Eggs were stripped from AB females (n = 4), gently mixed, divided into approximately same  
180 portions and fertilized with sperm from chimeric triploid males individually. Control group for  
181 semi-natural and *in vitro* fertilization consisted AB females and vas:EGFP males. Survival of  
182 produced embryos was monitored. Offspring from each group were pooled together and 10  
183 randomly selected larvae were used for PCR analysis. DNA was extracted from larvae by  
184 PureLink™ Genomic DNA Mini Kit (Invitrogen™). GFP forward primer  
185 ACGTAAACGGCCACAAGTTC, reverse primer AAGTCGTGCTGCTTCATGTG. Primers were  
186 tested for specificity. The reaction mixture for PCR contained 1 µl template cDNA, 0.5 µl forward  
187 and 0.5 µl reverse primer, 5 µl PPP Master Mix (Top-Bio) and 3 µl PCR H<sub>2</sub>O (Top-Bio). Reaction  
188 conditions were 30 cycles of 94 °C for 30 s, 58 °C for 30 s and 72 °C for 30 s. Products were  
189 analyzed on gel electrophoresis on 2% agarose gel on a UV illuminator.

190

## 191 **2.6 Histology analysis**

192 Euthanized zebrafish triploids and diploid controls were fixed overnight in the Bouin's fixative.  
193 Samples were immersed in 70% ethanol, dehydrated and cleared in an ethanol-xylene series,  
194 embedded into paraffin blocks and cut into 4µm thick sections using a rotary microtome (Leica  
195 RM2235). Paraffin slides were stained with hematoxylin and eosin by using a staining machine  
196 (Tissue-Tek DRS 2000) according to standard procedures. Histological sections were photographed  
197 and evaluated using a microscope with mounted camera (Nikon Eclipse Ci).

198

## 199 **2.7 Statistical analysis**

200 Survival of embryos was analyzed by logistic regression with mixed effects where the treatment  
201 was set as fixed effect while females were set as random effect with different intercepts (as  
202 mentioned above, eggs in each groups were obtained from five females). Post hoc Tukey's test was  
203 performed to find out significant differences among groups of different treatment. The effect of  
204 treatment on a number of triploids was analyzed by Friedman test where individual females were  
205 set as blocks. Differences among groups were analyzed by Post-hoc Conover test with Benjamini-  
206 Hochberg correction [35]. All analysis were performed in R software (3.5.2).

207

## 208 **3 Results**

### 209 **3.1 Production of triploid recipients for surrogate reproduction**

210 The testing of CS revealed that exposition in 6 °C water bath resulted in significantly higher triploid  
211 production and survival in comparison to CS at 3° C. Few triploids were also produced at 3 °C CS,  
212 but lower temperature was more detrimental to early embryonic development when even swim-up  
213 embryos exhibited malformations (Supplementary figure 1). Cold shock conducted at 9 °C had the  
214 lower effectiveness for triploid induction. Testing of prolonged CS duration yielded comparable  
215 fraction of detected triploids in all tested durations, however, survival rate was more favorable in 5  
216 and 10 min lasting CS treatment. Optimized CS temperature (6 °C) and duration (5 min) were used  
217 further to test different initiation times after fertilization. Yield of triploid fish was improved  
218 significantly when CS was initiated at 30 seconds post fertilization (spf) (Figure 1A-C).

219 Triploid induction by HS treatment tested different temperatures and shock duration during the first  
220 trial. HS treatment at 42 °C was lethal for all embryos (data not shown) and viable triploids were  
221 produced only at 41 and 41.4 °C. Viability and triploid yield was slightly in favor of HS at 41.4 °C,  
222 and thus it was used in the second HS trial assessing different HS durations. Fraction of detected  
223 triploids in HS treated embryos was significantly higher at HS lasting 1 and 2 min, and further HS  
224 prolongation resulted in significantly decreased survival rate only. Last HS trial tested different  
225 initiation time for HS treatment at 41.4 °C lasting 2 min. Treatment initiated 2 mpf (minutes post  
226 fertilization) yielded significant higher survival as well as triploid induction rate in comparison to  
227 1mpf (Figure 1 D-F), moreover, embryos treated at 1mpf had less expanded chorion  
228 (Supplementary figure 2) and most of them did not hatched even when embryos appeared to be  
229 developed normally. Therefore, **treatment at 41.4 °C initiated 2 mpf and lasting 2 min was**  
230 **identified as optimal protocol for triploid induction and was used to produce recipients for**  
231 **germ cell transplantation in following experiment.**

232

### 233 **Figure 2**

234

### 235 **3.2 Germline chimera generation and reproduction**

236 Despite of relatively invasive transplantation and sequentially presence of exogenous cells, the  
237 survival rate was similar among transplanted triploids, non-transplanted triploids and control  
238 diploids (Table 2). Transplanted testicular and ovarian cells from vas:EGFP donors (Figure 2) into  
239 triploid recipient showed strong signal after transplantation (Figure 3a). At 1wpt genital ridge of



240 transplanted fish showed various patterns of germ cell colonization, large number of transplanted  
241 cells surrounded whole glass bladder (Figure 3 B); 5-20 cells located in the genital ridge close to the  
242 posterior part of the gas bladder; few individual cells located alongside the genital ridge. All  
243 patterns of colonization were represented in approximately same ratio. Transplanted ovarian cells  
244 were mostly found as a few or individual cells alongside the genital ridge, probably due to the lower  
245 number of transplanted cells. More than half of the positive germline chimeras receiving testicular  
246 cells showed the colonization bilaterally in the genital ridges. Noticeable proliferation of  
247 transplanted cells started at 7-12 dpt in majority of positive germline chimeras. Observation of  
248 transplanted fish at 2-3 wpt showed GFP positive cells proliferating and forming clusters alongside  
249 the gas bladder (Figure 3 C,E) or progression towards the anterior in case of cells originally  
250 colonizing posterior part of gas bladder. Observation of gonadal development was difficult due to  
251 deposits of fat cells surrounding gonads (Figure 3 E, E'). Typical patterns of vas:EGFP cells  
252 development in triploid recipients are shown in Figure 3. Fish were screened at 10 weeks post  
253 fertilization (wpf) for presence of GFP signal in gonads (Figure 4) and finclips of positive germline  
254 chimeras were taken for flow cytometry examination and triploidy of all positive chimeras was  
255 confirmed. All chimeras developed phenotypically in males regardless of origin of transplanted  
256 cells (testicular or ovarian). Colonization rate assessed by 10dpt was higher in TC groups in  
257 comparison to OC groups (Table 2).

258

### 259 **Figure 3**

260 Colonized part of the testis of dissected adults could be detected easily in bright field according to  
261 its white color with observable lobules while control triploid testis were almost transparent (Figure  
262 4). Exogenous cells were localized unilaterally mostly when middle and/or posterior part of the  
263 gonad was colonized with little extent towards anterior. Triploids developed phenotypic testis, with  
264 visible spermatogonia clusters, spermatids (including spermatids apparently in zygotene and  
265 pachytene stage) when only few spermatozoa were observed in the tubular lumens from non-  
266 transplanted control. Testis from control diploid testis had tubular lumens filled with spermatozoa.  
267 (Figure 5). Dissection showed positive GFP signal in triploid germline chimeras and in control  
268 donor vas:EGFP strain, while no GFP signal was detected in control non-transplanted triploid and  
269 normal control AB males.

### 270 **Figure 4**

### 271 **Figure**

**5**

| Trial Group              | I.     |        |       |       | II.   |       |      |      | III.  |       |      |      |
|--------------------------|--------|--------|-------|-------|-------|-------|------|------|-------|-------|------|------|
|                          | TC     | OC     | 3n C  | 2n C  | TC    | OC    | 3n C | 2n C | TC    | OC    | 3n C | 2n C |
| Transplanted             | 30     | 30     | 30    | 30    | 30    | 30    | 30   | 30   | 30    | 30    | 30   | 30   |
| 24hpt Survival           | 29     | 28     | 29    | 30    | 28    | 29    | 30   | 30   | 29    | 29    | 30   | 30   |
| 1wpt Survival total      | 27     | 26     | 28    | 29    | 28    | 26    | 28   | 28   | 27    | 26    | 26   | 27   |
| GFP +                    | 22     | 18     | -     | -     | 15    | 16    | -    | -    | 24    | 15    | -    | -    |
| 2wpt Survival Total/GFP  | 24/20  | 22/17  | 26/-  | 28/-  | 24/13 | 23/14 | 24/- | 26/- | 23/21 | 21/11 | 25/- | 26/- |
| GFP+                     | 16     | 12     | -     | -     | 11    | 10    | -    | -    | 20    | 9     | -    | -    |
| 4wpt Survival Total/GFP  | 23/16  | 20/11  | 24/-  | 27/-  | 24/11 | 20/9  | 22/- | 26/- | 18/17 | 19/8  | 22/- | 26/- |
| GFP+                     | 14     | 10     | -     | -     | 11    | 7     | -    | -    | 13    | 8     | -    | -    |
| 10wpt Survival Total/GFP | 23/14* | 19/10* | 24/-* | 26/-* | 24/11 | 18/7  | 22/- | 26/- | 18/13 | 19/8  | 22/- | 23/- |
| GFP+                     | 12     | 8      | -     | -     | 9     | 7     | -    | -    | 11    | 8     | -    | -    |
| Survival Total/GFP       | 22/13  | 18/9   | 24/-  | 26/-  | 22/9  | 18/7  | 22/- | 26/- | 18/11 | 19/8  | 22/- | 23/- |
| Adult GFP+               | 13     | 9      | -     | -     | 9     | 7     | -    | -    | 11    | 8     | -    | -    |
| GFP+ sperm               | 11     | 7      | -     | -     | 7     | 5     | -    | -    | 9     | 7     | -    | -    |

273

274 **Table 2** Overall results from testicular and ovarian germ cell transplantation into triploid zebrafish recipients

275 Table 2 shows over results of germ cell transplantation into triploid recipients. Success of the transplantation was evaluated as a total numbers of  
 276 surviving fish until adulthood with detected positive GFP signal (GFP+) in their gonads evaluated *in vivo* and successful collection of GFP  
 277 positive sperm from adult germline chimeras (GFP+ sperm). 3n C group represents remainder of the triploids from the batch used for  
 278 transplantation. 2n C group is part of embryos non-treated by HS. From 1 wpt until adult whole group was always screened for positive GFP

279 signal and subdivided into positive and negative group in order to be able to distinguish potential loss of signal from mortality. Survival  
280 Total/GFP represents number of fish surviving from previous screening counted before next screening. \* Two GFP positive individuals from TC  
281 and OC and from 3n and 2n control groups were sacrificed for gonad observation.

282 Majority of GFP positive triploid germline chimeras produced sperm, with GFP signal detected in  
 283 all collected samples (Table 2, Figure 6) and were capable to fertilize AB strain eggs during semi-  
 284 natural as well as *in vitro* fertilization. In overall, reproductive performance of triploid germline  
 285 chimeras was similar to diploid control males from vas:EGFP strain, however, both tests showed  
 286 that the control males from vas:EGFP always had the highest performance evaluated as  
 287 fertilization rate, survival 24hpf and swim up rate, while germline chimeras transplanted by  
 288 ovarian cell had the lowest survival rate (Table 2 and 3). Later PCR analysis confirmed 100%  
 289 germline transmission, when GFP specific amplicon was detected (Table 3 and 4, Supplementary  
 290 figure 4).

291 **Figure 6**

292

| Group            | Male     | Eggs | Fertilization rate | Survival 24hpf | Swim up rate | GFP - PCR |
|------------------|----------|------|--------------------|----------------|--------------|-----------|
| Testicular cells | m1       | 39   | 32/82.1%           | 25/64.1%       | 21/53.8%     | 10/10     |
|                  | m2       | 66   | 60/90.9%           | 55/83.3%       | 49/74.2%     |           |
|                  | m3       | 85   | 65/76.5%           | 58/68.2%       | 51/60%       |           |
|                  | m4       | 52   | 46/88.5%           | 40/76.9%       | 34/65.4%     |           |
|                  | m5       | 64   | 54/84.5%           | 47/73.4%       | 37/57.8%     |           |
|                  | $\Sigma$ | 306  | 84.5±5%            | 73.2±6.7%      | 62.3±7.1%    |           |
| Ovarian cells    | m1       | 56   | 46/82.1%           | 46/82.1%       | 42/75%       | 10/10     |
|                  | m2       | 41   | 35/85.4%           | 31/75.6%       | 18/43.9%     |           |
|                  | m3       | 87   | 84/96.6%           | 72/82.8%       | 59/67.8%     |           |
|                  | m4       | 67   | 49/73.1%           | 41/61.2%       | 32/47.8%     |           |
|                  | m5       | 43   | 31/72.1%           | 25/58.1%       | 15/34.9%     |           |
|                  | $\Sigma$ | 294  | 81.9±8.9%          | 72±10.4%       | 53.9±15.1%   |           |
| Control          | m1       | 68   | 56/82.4%           | 51/75%         | 50/73.5%     | 10/10     |
|                  | m2       | 36   | 32/88.9%           | 29/80.6%       | 25/69.4%     |           |
|                  | m3       | 84   | 77/91.7%           | 72/85.7%       | 63/75%       |           |
|                  | m4       | 32   | 29/90.6%           | 22/68.8%       | 17/53.1%     |           |
|                  | m5       | 40   | 39/97.5%           | 31/77.5%       | 27/67.5%     |           |
|                  | $\Sigma$ | 260  | 90.2±4.9%          | 77.5±5.7%      | 67.7±7.8%    |           |

293 **Table 3** *In vitro* fertilization test of triploid germline chimeras producing donor-derived sperm

294 Table 3 shows overall results of fertilization test when sperm collected from randomly chosen  
 295 germline chimera males was used to fertilize pooled eggs obtained by stripping from four males.  
 296 Fertilization rate, survival 24hpf and swim up rate is expressed in total numbers/%, summarized  
 297 results from survival rates are expressed in % as mean ±S D. PCR – GFP shows results of

298 detection of GFP specific amplicon in 10 randomly selected swim up larvae from pool in each  
 299 group

| Group            | Male     | Eggs      | Fertilization rate | Survival 24hpf | Swim up rate | PCR - GFP |
|------------------|----------|-----------|--------------------|----------------|--------------|-----------|
| Testicular cells | m1       | 149       | 82/55%             | 73/49%         | 69/46.3%     | 10/10     |
|                  | m2       | 76        | 55/72.4%           | 48/63.2%       | 32/42.1%     |           |
|                  | m3       | 134       | 82/61.2%           | 70/52.2%       | 62/46.3%     |           |
|                  | m4       | 52        | 38/73.1%           | 35/67.3%       | 28/53.8%     |           |
|                  | m5       | 82        | 51/62.2%           | 44/53.7%       | 34/41.5%     |           |
|                  | $\Sigma$ | 493       | 64.8±6.9%          | 57.1±7%        | 46±4.4%      |           |
| Ovarian cells    | m1       | 79        | 55/69.6%           | 38/48.1%       | 32/40.5%     | 10/10     |
|                  | m2       | 37        | 23/62.2%           | 21/56.8%       | 18/48.6%     |           |
|                  | m3       | 63        | 39/61.9%           | 34/54%         | 20/31.7%     |           |
|                  | m4       | 108       | 72/66.7%           | 68/63.8%       | 53/49.1%     |           |
|                  | m5       | 97        | 42/43.3%           | 30/30.9%       | 24/24.7%     |           |
|                  | $\Sigma$ | 384       | 60.7±9.2%          | 50.5±10.9%     | 38.9±9.5%    |           |
| Control          | m1       | 114       | 95/83.3%           | 87/76.3%       | 70/61.4%     | 10/10     |
|                  | m2       | 89        | 61/68.5%           | 49/51.1%       | 44/49.4%     |           |
|                  | m3       | 74        | 52/70.3%           | 49/62.2%       | 43/58.1%     |           |
|                  | m4       | 82        | 43/52.4%           | 38/46.3%       | 32/39%       |           |
|                  | m5       | 34        | 28/82.4%           | 25/73.5%       | 22/64.7%     |           |
|                  | m6       | 98        | 65/66.3%           | 58/59.2%       | 45/45.9%     |           |
|                  | m7       | 56        | 38/67.9%           | 32/57.1        | 24/42.9%     |           |
| $\Sigma$         | 547      | 70.2±9.7% | 61.4±9.7%          | 51.6±9.1%      |              |           |

300 **Table 4** Fertilization test of triploid germline chimeras after semi-artificial mating with AB  
 301 females.

302 Table 4 shows overall results of fertilization test when germline chimeric males previously  
 303 confirmed for GFP sperm production were randomly selected (10 males from each group) and set  
 304 individually with two AB females and allowed to spawn. Note that only successful spawnings  
 305 were included in this table, while five males from TC and OC, and three males from C group did  
 306 not induce oviposition. Fertilization rate, survival 24hpf and swim up rate is expressed in total  
 307 numbers/%, summarized results from survival rates are expressed in % as mean ± SD. PCR – GFP  
 308 shows results of detection of GFP specific amplicon in 10 randomly selected swim up larvae from  
 309 pool in each group

310

## 311 **4 Discussion**

312 Cold and heat shock treatments were tested in zebrafish in order to optimize method for triploid  
313 production. The produced triploids were then used as sterile recipients for surrogate reproduction.  
314 Heat shock treatment at 2 mpf, lasting 2min with temperature 41 °C was identified as the most  
315 suitable, for reliable triploid zebrafish production. All artificially induced triploids developed in  
316 phenotypic sterile males. We further tested their suitability as a surrogate parents when a fraction  
317 of testicular and ovarian cells was transplanted intraperitoneally. Colonization rates were in favour  
318 of testicular cells, however, only male triploid germline chimeras, which were fertile and capable  
319 to mate with females from AB strain, were produced.

320

#### 321 **4.1 Triploid induction**

322 First triploid induction in zebrafish have been reported by [33], when fertilized eggs were treated  
323 at 2.5 mpf at 41 °C, for 4 min, however, this conditions always resulted in complete mortality in  
324 our conditions. Other studies used abovementioned protocol with slight modification such as at  
325 2.5 mpf at 41 °C, for 2 min [36] or 2 mpf at 41 °C, for 2 min [37]. Our results showed, that only  
326 heat shock treatment is suitable for effective triploid production. Only partial fraction of triploid  
327 swim up larvae was obtained after optimized cold shock treatment, moreover, survival was  
328 significantly higher after HS compared to CS. All adult triploids developed in phenotypic males  
329 with testis almost free of spermatozoon, while control diploid males showed lumens filled with  
330 spermatozoon. Apparently large proportion of germ cells in triploid testis were observed to be  
331 arrested in pachytene of the first meiosis as it is result of odd chromosome number exhibiting in  
332 disorganized synapsis [38]. These results confirmed previously reported findings when all triploid  
333 zebrafish with some exception where few female individuals among males. In our study, no  
334 triploid females were detected at all. Only male occurrence in artificially induced triploid is  
335 extremely rare in fish, to the best of our knowledge documented in zebrafish [37] and Rosy  
336 bitterling [39].

337

#### 338 **4.2 Surrogate reproduction**

339 Artificially induced triploids have been used successfully as recipients for surrogate gamete  
340 production in several fish species such as masu salmon [2], grass puffer [14], medaka [9], rainbow  
341 trout [40,41] and nibe croaker [13]. To the best of our knowledge this study provided the first  
342 report of suitability of triploid swim up larvae as a recipient for intraspecific transfer of  
343 germ cells and production of donor-derived gametes. As was previously described, triploid  
344 zebrafish developed in males only [37], even after rescuing their fertility by transplantation of  
345 testicular or ovarian cells.

346 Germ stem cells have been proved to be bipotential gamete precursors as they can develop in  
347 recipients gonads into female or male germ cells according to the recipient's sex [3].  
348 Spermatogonia transplantation in species with male heterogamety resulted in partial production of  
349 YY rainbow trout supermales after mating male and female germline chimeras. This approaches  
350 could serve as an alternative for mono sex culture production which is normally achieved by  
351 production and subsequent mating of androgenetic or gynogenetic stocks [42].  
352 Situation in zebrafish and sex control is more complicated, since some families can produce  
353 extremely biased offspring when percentage of males can vary from 4.8% to 97.3% [43] or from  
354 0% to 75% when fish were challenged to unfavorable or affluent conditions [44]. This  
355 phenomenon is attributed to polygenic sex determination with the further influence of the  
356 surrounding environment [45,46], moreover, two zebrafish lines have been shown to lack sex-  
357 linked loci [47]. Thus, a different subpopulation of zebrafish can produce progeny in very  
358 fluctuating sex ratios.

359 Theoretically, part of progeny produced using sperm from triploid germline chimeras transplanted  
360 by ovarian cells should after fertilization of normal eggs should yield fraction of WW super  
361 females progeny, which could be interesting model for other fish species possessing female  
362 heterogamety sex determination. Then in turn, induction of triploidy with of eggs obtained from  
363 WW females fertilized with sperm from triploid germline chimera possessing W or Z  
364 chromosome should yield fraction of WWW super female triploids, which could provide more  
365 insights into sex determination in zebrafish and only triploid male occurrence.

366 Real use of zebrafish recipients in surrogate reproduction resulted in only male germ line chimera  
367 production independently on used approach of zebrafish sterilization and type of germline transfer  
368 such as using blastomeres, single PGCs or adult germ stem cell [15,48,49]. Production fertile  
369 zebrafish female chimera seems to be not possible so far. Reason for literally absence of germline  
370 chimera females is attributed to sterilization of recipient by PGCs depletion. In zebrafish, certain  
371 numbers of PGCs are required to maintain the ovarian fate [17]. When taking in account that very  
372 few of transplanted cells are capable to colonize the recipient's gonad, it is clear that such low  
373 number of cells bellow a threshold (3-29 PGCs) cannot maintain ovarian fate. Moreover, it has  
374 been shown that female germ cell presence is essential even in adulthood to maintain ovarian fate  
375 and prevent sex reverse into functional male [50].

376 In conclusion to carry out whether and how to produce zebrafish germline chimeras producing  
377 eggs, following possibilities have not been tested yet. 1) Hormonal treatment optimization for  
378 zebrafish germline chimeras as was firstly attempted by Saito et al., (2008) on zebrafish x pearl  
379 danio hybrid when 3 from 4 fish developed as females, but were not able to produce eggs. 2)

380 Increasing a number of germ cells colonizing the recipient gonad might have an effect on sex  
381 differentiation in germ line chimera as was proven for a number of PGCs, since so far it was  
382 shown that only few individual cells are colonizing gonads after transplantation. 3) Co-  
383 transplantation of female germ stem cells with early oocytes could also act supportively for female  
384 sex differentiation in germline chimera, however, this method has not been tested yet. 4)  
385 Essentiality of *dmrt1* and *amh* gene for proper male development have been reported recently in  
386 zebrafish [51,52], thus DNA and RNA interfering approaches such knockdown or knock out could  
387 influence sex ratio in germline chimeras in favour of females.

388

## 389 **5 Conclusion**

390 Surrogate reproduction via germ cell transplantation into zebrafish triploid developed in this study  
391 could have potential to serve as an alternative way for zebrafish gene resource banking since it can  
392 be combined with a convenient method for spermatogonia cryopreservation by needle immersed  
393 vitrification [53]. Up to day, literally, thousands of mutants, transgenic lines and recently  
394 CRISPR/Cas9, ZFN or TALEN genetically engineered strains have been generated in zebrafish  
395 which makes gene banking of utmost importance [54–56]. Similarly, triploid males can be used as  
396 recipients to improve sperm production when originally few individuals are available for breeding  
397 or given line suffer from poor reproductive performance as was shown in medaka when the  
398 reproductive performance of an inbred strain was improved by transplantation into triploid  
399 surrogates [9]. From our experience, a number of early-stage germ cells obtained from testis  
400 originating from single adult zebrafish male is sufficient for intraperitoneal transplantation into at  
401 least 40-50 individuals. Thus taking into account that at least 23 % of transplanted triploid  
402 zebrafish produced donor sperm (TC group), at least 10 fertile triploid males can be recovered  
403 using testis from a single donor. It is noteworthy to point out that triploid zebrafish germ line  
404 chimeras in our study were capable to mate with females from AB line in common spawning  
405 chamber, and their reproductive characteristics were comparable to mating with normal diploid  
406 males. Described HS protocol for triploid production is a simple method for sterile zebrafish  
407 production which does not require microinjection in embryos for delivery of compounds for gene  
408 knockdown or knock out to ensure sterilization. However, only sperm production from using  
409 PGCs depleted or hybrid recipient leaves an issue which needs to be addressed in order to produce  
410 donor derive eggs from zebrafish recipient.

411 Acknowledgements



412 The study was financially supported by the Ministry of Education, Youth and Sports of the Czech  
413 Republic, projects CENAKVA (LM2018099) and Biodiversity  
414 (CZ.02.1.01/0.0/0.0/16\_025/0007370), by the Grant Agency of the University of South Bohemia  
415 in České Budějovice GAJU 097/2019/Z and 034/2017/Z. The Czech Science Foundation (project  
416 No. 17-19714Y) and NAZV QK1910248.

417 Contribution and disclosure

418 RF and MP: conceptualization, designing of the study, performing experiments, data collection  
419 and funding acquisition, TT: data collection and analysis, CS and MF: ploidy analysis and  
420 histology sections. All authors contributed on manuscript drafting and approved the submitted  
421 version.

422 Declarations of interest: none.

423 The funders had no role in study design, data collection and analysis, and preparation of the  
424 manuscript.

425

426

427 References

- 428 [1] de Siqueira-Silva DH, Saito T, dos Santos-Silva AP, da Silva Costa R, Psenicka M, Yasui  
429 GS. Biotechnology applied to fish reproduction: tools for conservation. *Fish Physiol*  
430 *Biochem* 2018;44:1469–85. doi:10.1007/s10695-018-0506-0.
- 431 [2] Okutsu T, Shikina S, Kanno M, Takeuchi Y, Yoshizaki G. Production of Trout Offspring  
432 from Triploid Salmon Parents. *Science (80- )* 2007;317:15–7.
- 433 [3] Yoshizaki G, Lee S. Production of live fish derived from frozen germ cells via germ cell  
434 transplantation. *Stem Cell Res* 2018;29:103–10. doi:10.1016/j.SCR.2018.03.015.
- 435 [4] Franěk R, Tichopád T, Steinbach C, Xie X, Marinović Z, Kašpar V, et al. Preservation of  
436 female genetic resources of common carp through oogonial stem cell manipulation.  
437 *Cryobiology* 2019;78-85. doi:10.1016/j.cryobiol.2019.01.016.
- 438 [5] Octavera A, Yoshizaki G. Production of donor-derived offspring by allogeneic  
439 transplantation of spermatogonia in Chinese rosy bitterling. *Biol Reprod* 2018;0:1–10.  
440 doi:10.1093/biolre/ioy236.
- 441 [6] Farlora R, Hattori-Ihara S, Takeuchi Y, Hayashi M, Octavera A, Alimuddin, et al.  
442 Intraperitoneal germ cell transplantation in the Nile tilapia *Oreochromis niloticus*. *Mar*  
443 *Biotechnol (NY)* 2014;16:309–20. doi:10.1007/s10126-013-9551-y.
- 444 [7] Lacerda SMSN, Batlouni SR, Costa GMJ, Segatelli TM, Quirino BR, Queiroz BM, et al. A  
445 new and fast technique to generate offspring after germ cells transplantation in adult fish:  
446 The Nile tilapia (*Oreochromis niloticus*) model. *PLoS One* 2010;5:1–9.  
447 doi:10.1371/journal.pone.0010740.
- 448 [8] Lacerda S, Batlouni S, Silva S, Homem C, França L. Germ cells transplantation in fish: the  
449 Nile-tilapia model. *Anim Reprod* 2006;3:146–59.
- 450 [9] Seki S, Kusano K, Lee S, Iwasaki Y, Yagisawa M, Ishida M, et al. Production of the  
451 medaka derived from vitrified whole testes by germ cell transplantation. *Sci Rep*  
452 2017;7:43185. doi:10.1038/srep43185.
- 453 [10] Pšenička M, Saito T, Rodina M, Dzyuba B. Cryopreservation of early stage Siberian  
454 sturgeon *Acipenser baerii* germ cells, comparison of whole tissue and dissociated cells.  
455 *Cryobiology* 2016;72:199–122. doi:10.1016/j.cryobiol.2016.02.005.

- 456 [11] Linhartová Z, Saito T, Kašpar V, Rodina M, Prášková E, Hagihara S, et al. Sterilization of  
457 sterlet *Acipenser ruthenus* by using knockdown agent, antisense morpholino  
458 oligonucleotide, against *dead end* gene. *Theriogenology* 2015;84:1246–55.  
459 doi:10.1016/j.theriogenology.2015.07.003.
- 460 [12] Ye H, Li C-J, Yue H-M, Du H, Yang X-G, Yoshino T, et al. Establishment of  
461 intraperitoneal germ cell transplantation for critically endangered Chinese sturgeon  
462 *Acipenser sinensis*. *Theriogenology* 2017;94:37–47.  
463 doi:10.1016/j.theriogenology.2017.02.009.
- 464 [13] Yoshikawa H, Takeuchi Y, Ino Y, Wang J, Iwata G, Kabeya N, et al. Efficient production  
465 of donor-derived gametes from triploid recipients following intra-peritoneal germ cell  
466 transplantation into a marine teleost, Nibe croaker (*Nibea mitsukurii*). *Aquaculture*  
467 2017;478:35–47. doi:10.1016/J.AQUACULTURE.2016.05.011.
- 468 [14] Hamasaki M, Takeuchi Y, Yazawa R, Yoshikawa S, Kadomura K, Yamada T, et al.  
469 Production of Tiger Puffer *Takifugu rubripes* Offspring from Triploid Grass Puffer  
470 *Takifugu niphobles* Parents. *Mar Biotechnol* 2017;19:579–91. doi:10.1007/s10126-017-  
471 9777-1.
- 472 [15] Li Q, Fujii W, Naito K, Yoshizaki G. Application of *dead end* -knockout zebrafish as  
473 recipients of germ cell transplantation. *Mol Reprod Dev* 2017. doi:10.1002/mrd.22870.
- 474 [16] Slanchev K, Stebler J, de la Cueva-Méndez G, Raz E. Development without germ cells: the  
475 role of the germ line in zebrafish sex differentiation. *Proc Natl Acad Sci U S A*  
476 2005;102:4074–9. doi:10.1073/pnas.0407475102.
- 477 [17] Tzung KW, Goto R, Saju JM, Sreenivasan R, Saito T, Arai K, et al. Early depletion of  
478 primordial germ cells in zebrafish promotes testis formation. *Stem Cell Reports* 2015;4:61–  
479 73. doi:10.1016/j.stemcr.2014.10.011.
- 480 [18] Wong T-T, Zohar Y. Production of reproductively sterile fish by a non-transgenic gene  
481 silencing technology. *Sci Rep* 2015:1–6. doi:10.1016/j.ygcen.2014.12.012.
- 482 [19] Zhou L, Feng Y, Wang F, Dong X, Jiang L, Liu C, et al. Generation of all-male-like sterile  
483 zebrafish by eliminating primordial germ cells at early development. *Sci Rep* 2018;8:1–12.  
484 doi:10.1038/s41598-018-20039-3.
- 485 [20] Wong TT, Collodi P. Inducible Sterilization of Zebrafish by Disruption of Primordial Germ

- 486 Cell Migration. PLoS One 2013;8:1–8. doi:10.1371/journal.pone.0068455.
- 487 [21] Nóbrega RH, Greebe CD, van de Kant H, Bogerd J, de França LR, Schulz RW.  
488 Spermatogonial stem cell niche and spermatogonial stem cell transplantation in zebrafish.  
489 PLoS One 2010;5:1–16. doi:10.1371/journal.pone.0012808.
- 490 [22] Wong T-T, Saito T, Crodian J, Collodi P. Zebrafish germline chimeras produced by  
491 transplantation of ovarian germ cells into sterile host larvae. Biol Reprod 2011;84:1190–7.  
492 doi:10.1095/biolreprod.110.088427.
- 493 [23] Piva LH, de Siqueira-Silva DH, Goes CAG, Fujimoto T, Saito T, Dragone LV, et al.  
494 Triploid or hybrid tetra: Which is the ideal sterile host for surrogate technology?  
495 Theriogenology 2018;108:239–44. doi:10.1016/j.theriogenology.2017.12.013.
- 496 [24] Otani S, Ohara M, Miyashita S, Kobayashi T. A method for the microinjection into  
497 naturally spawned eggs of marine fish, especially cultured Pacific bluefin tuna *Thunnus*  
498 *orientalis*. Fish Sci 2008;74:208–10. doi:10.1111/j.1444-2906.2007.01512.x.
- 499 [25] Goto R, Saito T, Matsubara T, Yamaha E. Microinjection of Marine Fish Eggs. Humana  
500 Press, New York, NY; 2019, p. 475–87. doi:10.1007/978-1-4939-8831-0\_27.
- 501 [26] Tiwary BK, Kirubakaran R, Ray AK. The biology of triploid fish. Rev Fish Biol Fish  
502 2004;14:391–402. doi:10.1007/s11160-004-8361-8.
- 503 [27] Arai K. Genetic improvement of aquaculture finfish species by chromosome manipulation  
504 techniques in Japan. Aquaculture 2001;197:205–28. doi:10.1016/S0044-8486(01)00588-9.
- 505 [28] Hulata G. Genetic manipulations in aquaculture: A review of stock improvement by  
506 classical and modern technologies. Genetica 2001;111:155–73.  
507 doi:10.1023/A:1013776931796.
- 508 [29] Felip A, Zanuy S, Carrillo M, Piferrer F. Induction of triploidy and gynogenesis in teleost  
509 fish with emphasis on marine species. Genetica 2001;111:175–95.  
510 doi:10.1023/A:1013724322169.
- 511 [30] Zhou L, Gui J. Natural and artificial polyploids in aquaculture. Aquac Fish 2017;2:103–11.  
512 doi:10.1016/j.aaf.2017.04.003.
- 513 [31] Piferrer F, Beaumont A, Falguière JC, Flajšhans M, Haffray P, Colombo L. Polyploid fish  
514 and shellfish: Production, biology and applications to aquaculture for performance

- 515 improvement and genetic containment. *Aquaculture* 2009;293:125–56.  
516 doi:10.1016/j.aquaculture.2009.04.036.
- 517 [32] Hassan A, Okomoda VT, Pradeep PJ. Triploidy induction by electric shock in red hybrid  
518 tilapia. *Aquaculture* 2018;495:823–30. doi:10.1016/J.AQUACULTURE.2018.06.074.
- 519 [33] Kavumpurath S, Pandian TJ. Induction of triploidy in the zebrafish, *Brachydanio rerio*  
520 (Hamilton). *Aquac Res* 1990;21:299–306. doi:10.1111/j.1365-2109.1990.tb00468.x.
- 521 [34] Rodina M, Cosson J, Gela D, Linhart O. Kurokura solution as immobilizing medium for  
522 spermatozoa of tench (*Tinca tinca* L.). *Aquac Int* 2004;12:119–31.  
523 doi:10.1023/B:AQUI.0000017192.75993.e3.
- 524 [35] Benjamini, Yoav., Hochberg Y. Controlling the false discovery rate a practical and  
525 powerful approach to multiple testing. *J R Stat Soc* 1995;57:289–300.  
526 doi:10.2307/2346101.
- 527 [36] Mizgireuv IV, Majorova IG, Gorodinskaya VM, Khudoley VV, Revskoy SY. Carcinogenic  
528 Effect of N-Nitrosodimethylamine on Diploid and Triploid Zebrafish (*Danio rerio*).  
529 *Toxicol Pathol* 2004;32:514–8. doi:10.1080/01926230490496311.
- 530 [37] Delomas TA, Dabrowski K. Why are triploid zebrafish all male? *Mol Reprod Dev*  
531 2018;85:612–21. doi:10.1002/mrd.22998.
- 532 [38] Feitsma H, Leal MC, Moens PB, Cuppen E, Schulz RW. *Mhl1* deficiency in zebrafish  
533 results in male sterility and aneuploid as well as triploid progeny in females. *Genetics*  
534 2007;175:1561–9. doi:10.1534/genetics.106.068171.
- 535 [39] Ueno K, Arimoto B. Induction of triploids in *Rhodeus ocellatus ocellatus* by cold shock  
536 treatment of fertilized eggs. *Experientia* 1982;38:544–6. doi:10.1007/BF02327041.
- 537 [40] Lee S, Katayama N, Yoshizaki G. Generation of juvenile rainbow trout derived from  
538 cryopreserved whole ovaries by intraperitoneal transplantation of ovarian germ cells.  
539 *Biochem Biophys Res Commun* 2016;478:1478–83. doi:10.1016/j.bbrc.2016.08.156.
- 540 [41] Lee S, Iwasaki Y, Shikina S, Yoshizaki G. Generation of functional eggs and sperm from  
541 cryopreserved whole testes. *Proc Natl Acad Sci USA* 2013;110:1640–5.  
542 doi:10.1073/pnas.1218468110.
- 543 [42] Okutsu T, Shikina S, Sakamoto T, Mochizuki M, Yoshizaki G. Successful production of

- 544 functional Y eggs derived from spermatogonia transplanted into female recipients and  
545 subsequent production of YY supermales in rainbow trout, *Oncorhynchus mykiss*.  
546 Aquaculture 2015;446:298–302. doi:10.1016/j.aquaculture.2015.05.020.
- 547 [43] Liew WC, Bartfai R, Lim Z, Sreenivasan R, Siegfried KR, Orban L. Polygenic sex  
548 determination system in zebrafish. PLoS One 2012;7:e34397.  
549 doi:10.1371/journal.pone.0034397.
- 550 [44] Lawrence C, Ebersole JP, Kesseli R V. Rapid growth and out-crossing promote female  
551 development in zebrafish (*Danio rerio*). Environ Biol Fishes 2008;81:239–46.  
552 doi:10.1007/s10641-007-9195-8.
- 553 [45] Nagabhushana A, Mishra RK. Finding clues to the riddle of sex determination in zebrafish.  
554 J Biosci 2016;41:145–55.
- 555 [46] Liew WC, Orbán L. Zebrafish sex: a complicated affair. Brief Funct Genomics  
556 2014;13:172–87. doi:10.1093/bfpg/elt041.
- 557 [47] Wilson CA, High SK, McCluskey BM, Amores A, Yan Y, Titus TA, et al. Wild sex in  
558 zebrafish: loss of the natural sex determinant in domesticated strains. Genetics  
559 2014;198:1291–308. doi:10.1534/genetics.114.169284.
- 560 [48] Kawakami Y, Goto-Kazeto R, Saito T, Fujimoto T, Higaki S, Takahashi Y, et al.  
561 Generation of germ-line chimera zebrafish using primordial germ cells isolated from  
562 cultured blastomeres and cryopreserved embryoids. Int J Dev Biol 2010;54:1491–9.  
563 doi:10.1387/ijdb.093059yk.
- 564 [49] Saito T, Goto-Kazeto R, Arai K, Yamaha E. Xenogenesis in teleost fish through generation  
565 of germ-line chimeras by single primordial germ cell transplantation. Biol Reprod  
566 2008;78:159–66. doi:10.1095/biolreprod.107.060038.
- 567 [50] Dranow DB, Tucker RP, Draper BW. Germ cells are required to maintain a stable sexual  
568 phenotype in adult zebrafish. Dev Biol 2013;376:43–50.  
569 doi:10.1016/J.YDBIO.2013.01.016.
- 570 [51] Webster KA, Schach U, Ordaz A, Steinfeld JS, Draper BW, Siegfried KR. *Dmrt1* is  
571 necessary for male sexual development in zebrafish. Dev Biol 2017;422:33–46.  
572 doi:10.1016/j.ydbio.2016.12.008.
- 573 [52] Lin Q, Mei J, Li Z, Zhang X, Zhou L, Gui J-F. Distinct and Cooperative Roles of *amh* and

- 574 *dmrt1* in Self-Renewal and Differentiation of Male Germ Cells in Zebrafish. *Genetics*  
575 2017;207:1007–22. doi:10.1534/genetics.117.300274.
- 576 [53] Marinović Z, Lujčić J, Kása E, Csenki Z, Urbányi B, Horváth Á. Cryopreservation of  
577 Zebrafish Spermatogonia by Whole Testes Needle Immersed Ultra-Rapid Cooling. *J Vis*  
578 *Exp* 2018;2–7. doi:10.3791/56118.
- 579 [54] Geisler R, Köhler A, Dickmeis T, Strähle U, Strähle U, Scholz S, et al. Archiving of  
580 zebrafish lines can reduce animal experiments in biomedical research. *EMBO Rep*  
581 2016;18:128–32. doi:10.15252/embr.201643561.
- 582 [55] Robles V, Cabrera E, Paz Herráez M. Germplasm Cryobanking in Zebrafish and Other  
583 Aquarium Model Species. *Zebrafish* 2009;6:281–93. doi:10.1089/zeb.2009.0592.
- 584 [56] Agca Y. Genome resource banking of biomedically important laboratory animals.  
585 *Theriogenology* 2012;78:1653–65. doi:10.1016/J.THERIOGENOLOGY.2012.08.012.
- 586

## Figures

Color should be used for all figures listed bellow.

**Figure 1 Survival and success rate of triploid induction using cold shock (A-C) and heat shock treatment (D-F).** D) result from treatment at 42 °C were excluded because of total mortality of treated embryos. E) Results from heat shock duration for 4 min were excluded because of total mortality of treated embryos. Different letters above the confidence intervals (survival) or SD lines (number of triploids) indicate statistical significance (Tukey's HSD,  $p < 0.05$ ).

**Figure 2 Donors used for germ cell transplantation into triploid surrogate recipients.**

Ventral view on dissected vas:EGFP donors, A) male, bright field and A') fluorescent caption of testis, B) female, bright field and B') fluorescent caption of ovaries. Scale bars A and A') 2500  $\mu\text{m}$ , B and B') 5000  $\mu\text{m}$ .

**Figure 3 Patterns of colonization after vas:EGFP germ cells transplantation into triploid recipients.** Colonization patterns were observed 24hpf until 4wpt. Captions were taken using DA/FI/TR fluorescent filter. A-E) view on whole fish, scale bar 2mm. White rectangle depicts magnified view on vas:EGFP transplanted cells A'-E', scale bars 500 $\mu\text{m}$ .

**Figure 4 Gonadal development in juvenile and adult triploid germline chimera.** A-B) observation of gonadal development at 10wpt, positive colonization could be detected *in vivo*, B', C') – germ cell colonization is detected by GFP signal and pointed out by white arrowhead. B') ventral view on germline chimera gonads, with strong GFP signal in the right testis, left testis is non colonized (white arrow). White rectangles depict magnified captions of the colonized gonad (B', C' and E'). D, E') ventral bright field and fluorescent view on



gonads of adult triploid germline chimera. White rectangles depict magnified captions of the colonized gonad (C'-D'). White arrow indicates non colonized part of testis, white arrowheads indicate colonized testis with transplanted germ cells. F, F') non transplanted triploid control. Scale bars A-B', D-D', F-F' 2500  $\mu\text{m}$ , C-C' 750  $\mu\text{m}$ , E-E' 250  $\mu\text{m}$ .

**Figure 5 Photomicrographs of histological sections of zebrafish testis.** View on whole testis is in right upper corner. A) triploid individual, empty lumen is pointed out by arrow. B) diploid control male, lumen with spermatozoon is pointed out by arrow. Scale bars 50  $\mu\text{m}$ .

**Figure 6 Analysis of germline transmission in triploid surrogates.** A) fluorescent photomicrograph of sperm collected from triploid zebrafish germline chimera transplanted by testicular cells. White arrowheads indicate the head of spermatozoon with positive GFP signal. B) sperm collected from control diploid AB line male. Scale bars 20  $\mu\text{m}$ .

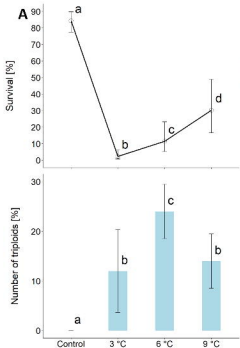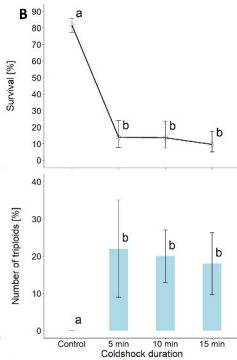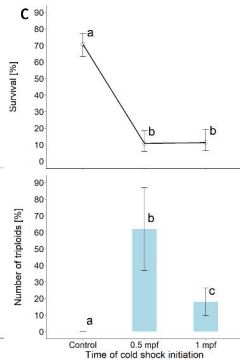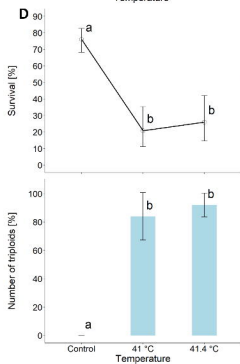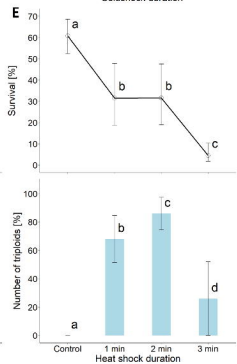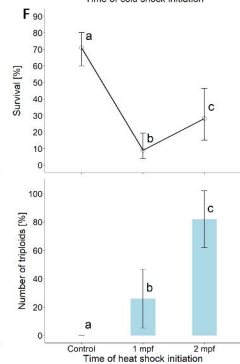

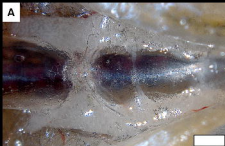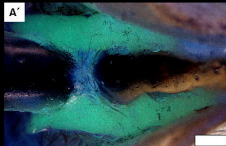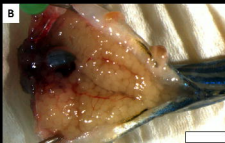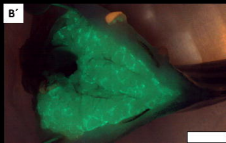

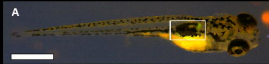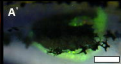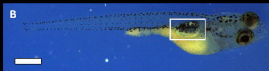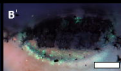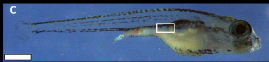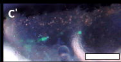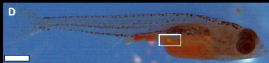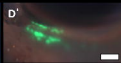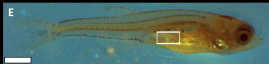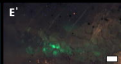

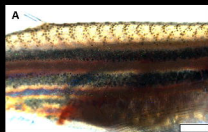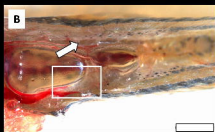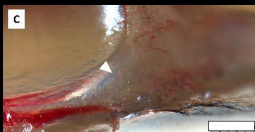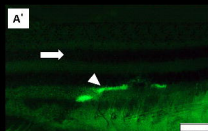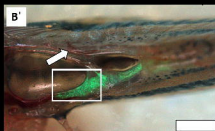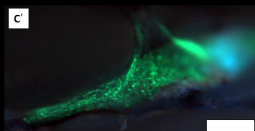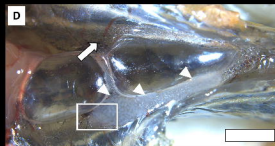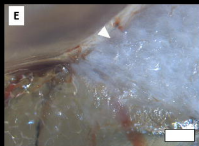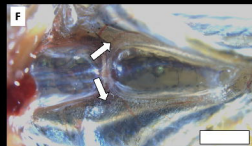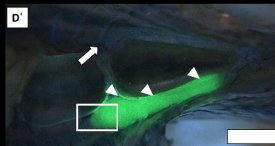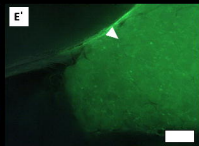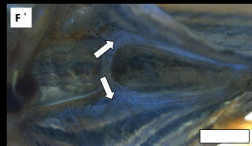

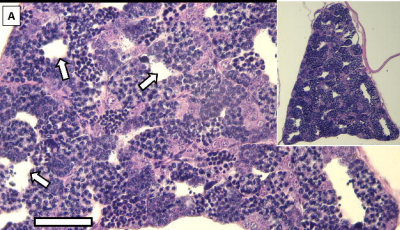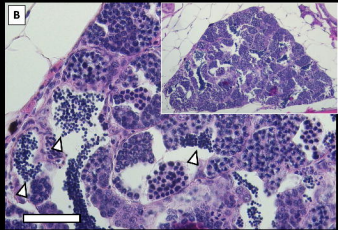

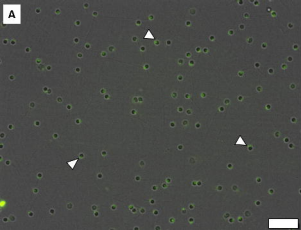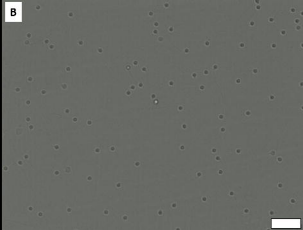

Source: https://www.biorxiv.org/content/10.1101/608687v1.full.pdf
